CORRECTION

## Correction: Diversity of root system architecture and root-shoot biomass allocation in industrial hemp (*Cannabis sativa* L.)

The *PLOS One* Staff

### Notice of Republication

This article was republished on April 13, 2026, to correct an error in the author list: the author Tyler Dowd was omitted in error. The publisher apologizes for the error. Please download this article again to view the correct version. The originally published, uncorrected article and the republished, corrected articles are provided here for reference.

### Supporting information

**S1 File. Originally published, uncorrected article.**  
(PDF)

**S2 File. Republished, corrected article.**  
(PDF)

### Reference

1. Morales EY, Griffiths M, Mankar SP, Bagnall GC, Dowd TG, Fletcher R, et al. Diversity of root system architecture and root-shoot biomass allocation in industrial hemp (*Cannabis sativa* L.). *PLoS One*. 2026;21(2):e0339929. <https://doi.org/10.1371/journal.pone.0339929> PMID: [41650193](https://pubmed.ncbi.nlm.nih.gov/41650193/)

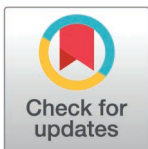

### OPEN ACCESS

**Citation:** The *PLOS One* Staff (2026) Correction: Diversity of root system architecture and root-shoot biomass allocation in industrial hemp (*Cannabis sativa* L.). *PLoS One* 21(5): e0349068. <https://doi.org/10.1371/journal.pone.0349068>

**Published:** May 7, 2026

**Copyright:** © 2026 The *PLOS One* Staff. This is an open access article distributed under the terms of the [Creative Commons Attribution License](https://creativecommons.org/licenses/by/4.0/), which permits unrestricted use, distribution, and reproduction in any medium, provided the original author and source are credited.
